# Supplementary material
Source: publisher figshare collection journal article supplement (https://geolsoc.figshare.com/ndownloader/files/14413289)
Supplement: Supplementary file 1 [file 14413289]

## Sheet: Sheet1
								Table ES3. Ch13. Murihiku Terrane tuffaceous sediments ICP-MS
Sample	NZ17-2	NZ/17-3	NZ17-4	NZ17-5	NZ17-16		NZ/17-103	NZ17-106	NZ/17-107	NZ17-108	NZ17-109		NZ/17-112	NZ17-113	NZ/17-116	NZ17-117	NZ17-119	OU30296	OU30230	OU30266	OU30359		N/17-190	NZ17-192	NZ17-193	NZ17-208
Group	Murihiku	Wiillsher Gp.	Murihiku	Murihiku	Murihiku		Murihiku	Murihiku	Murihiku	Murihiku	Murihiku		Murihiku	Murihiku	Murihiku	Murihiku	Murihiku	Murihiku	Murihiku	Murihiku	Murihiku		Murihiku	Murihiku	Murihiku	Murihiku
Area	Roaring Bay, N Range Gp., Early-Mid. Triassaic	Kaka Structure Belt	Roaring Bay, N Range Gp., Early-Mid Triassaic	Roaring Bay, N Range Gp., Early-Mid .Triassaic	Parks Cutting, N Range Gp., Early-Mid. Triassaic		Ram Hill, Gavenwood Tuffs, Mid.-Triassic	Ram Hill, Gavenwood Tuffs, Mid.-Triassic	Ram Hill, Gavenwood Tuffs, Mid.-Triassic	Ram Hill, Gavenwood Tuffs, Mid.-Triassic	Ram Hill, Gavenwood Tuffs, Mid.-Triassic		Hokonui Mtns., Bare Hill Tuff Zone, Late Triassic	Hokonui Mtns., Bare Hill Tuff Zone, Late Triassic	Hokonui Mtns., Bare Hill Tuff Zone, Late Triassic	Hokonui Mtns., Bare Hill Tuff Zone, Late Triassic	Hokonui Mtns., Bare Hill Tuff Zone, Late Triassic	Hokonui Mtns., Bare Hill Tuff Zone, Late Triassic	Hokonui Mtns., Bare Hill Tuff Zone, Late Triassic	Hokonui Mtns., Bare Hill Tuff Zone, Late Triassic	Hokonui Mtns., Bare Hill Tuff Zone, Late Triassic		Tank Off Champion Rd, Stoke area, Richmond Gp., Mid.-Late Triassic	Tank Off Champion Rd, Stoke area, Richmond Gp., Mid.-Late Triassic	Tank Off Champion Rd, Stoke area, Richmond Gp., Mid. -LateTriassic	Quarry, off Champion Rd.,Richmond Gp., Mid.-Late Triassic
GPS	59G 04 07843 UTM 48 55677	59G 04 07843 UTM 48 55677	59G 07824 UTM 48 55642	59G 07824 UTM 48 55642	69G 04 08030 UTM 48 56066		59G 04 98621 UTM 49 23203	59G 02 98629 UTM 49 23224	59G 02 98629 UTM 49 23224	59G 04 98584 UTM 49 23144	59G 04 98594 UTM 49 23161		59G 03 12408 UTM 49 03535	59G 03 12408 UTM 49 03535	59G 03 12418 UTM 49 03519	59G 03 12495 UTM 49 03472	59G 03 12453 UTM 49 03472	NA	NA	NA	NA		59G 06 85009 UTM54 20053	59G 06 85009 UTM54 20053	59G 06 84951 UTM54 20143	59G 06 86701 UTM 54 20703
		1
SiO2	64.8	1	69.26	61.74	69.11		60.48	68.36	64.37	67.4	60.62		67.11	72.75	68.43	68.08	67.14	71.17	61.76	65.34	58.85		54.76	62.72	55.5	59.28
Al2O3	14.89	76.1	14.14	16.51	16.01		21.16	16.08	16.1	15.37	18.15		16.67	13.69	15.95	15.72	15.88	15.32	15.09	13.38	16.69		19.47	17.55	15.24	17.12
Fe2O3	2.74	12.3	3.46	3.58	1.51		2.07	3.16	4.62	3.2	4.47		3.81	2.22	2.35	2.86	3.24	2.78	1.81	2.23	4.66		5.04	4.18	4.2	6.33
MgO	1.42	1.64	1.34	1.68	0.67		0.76	0.97	1.47	1.18	1.64		0.76	0.81	0.72	1.03	1.07	0.27	1.54	1.28	0.95		2.07	1.05	1.04	1.66
CaO	4.78	0.61	1.94	2.09	0.63		1.25	0.42	0.53	0.78	0.68		0.09	0.18	1.52	1.8	1.85	0.27	2.89	3.09	6.55		1.38	0.75	7.38	0.79
Na2O	1.63	0.57	3.26	3.03	2.25		3.32	1.37	1.17	1.61	1.06		0.28	0.8	3.89	3.97	3.94	7.45	1.07	1.51	1.96		1.07	1.82	2.51	2.93
K2O	1.67	4.04	2.21	2.88	4.92		3.14	2.15	4	4.18	4.91		2.01	3.33	3.45	3.51	3.53	0.47	2.16	2.58	0.2		2.11	3.19	2.67	3.25
TiO2	0.22	2.78	0.68	0.44	0.59		1.21	0.47	0.69	0.68	0.66		0.68	0.87	0.61	0.56	0.6	0.39	0.38	0.32	0.77		0.57	0.75	0.65	0.76
P2O5	0.06	0.4	0.16	0.07	0.08		0.03	0.04	0.05	0.08	0.04		0.04	0.06	0.17	0.17	0.17	0.1	0.05	0.05	0.1		0.04	0.07	0.78	0.05
MnO	0.04	0.08	0.04	0.04	0.01		0.03	0.03	0.04	0.02	0.02		0.03	0.02	0.03	0.04	0.04	0.02	0.01	0.04	0.07		0.02	0.02	0.22	0.05
Cr2O3	<0.002	0.04	0.005	<0.002	0.005		0.006	0.003	0.005	0.006	0.004		0.004	0.007	0.003	0.003	0.003	0.002	<0.002	<0.002	0.007		0.002	0.006	0.005	0.005
Ba	341	<0.002	636	1777	569		286	434	381	457	648		444	493	557	557	699	90	1128	742	110		881	426	440	396
Ni	<20	344	<20	<20	<20		<20	28	<20	<20	<20		<20	<20	<20	<20	<20	<20	<20	<20	<20		<20	<20	<20	<20
Sc	8	<20	11	12	12		19	11	14	15	16		11	14	11	10	11	6	9	6	15		12	13	13	12
LOI	7.6	6	3.2	7.1	4		6.4	6.8	6.8	5.3	7.5		8.4	5.1	2.7	2.1	2.3	1.7	12.8	10	9.1		13.1	7.7	9.6	7.6
Sum	99.89	1.3	99.79	99.36	99.83		99.88	99.93	99.89	99.84	99.84		99.91	99.88	99.85	99.87	99.87	99.93	99.74	99.86	99.88		99.73	99.88	99.86	99.88
Be	5	99.9	2	1	1		1	3	2	2	3		<1	2	2	2	2	3	2	3	1		2	<1	2	2
Co	20	2	53.8	35.7	6		12.7	3.6	9.4	8.3	5.8		15.1	5.5	23.1	11.7	18.1	8.4	5.1	13.6	22		8.9	4.3	12.5	23.9
Cs	8.1	31.9	6.1	4	7.5		6.6	7	15	7.6	13.8		6.4	6.2	2	1.6	1.8	0.2	3.1	2.1	0.8		5.7	6.6	2.9	5.2
Ga	23.2	0.9	16.9	21.2	20.9		18.7	16.6	18.2	20	21.8		18.4	29	18.1	18.1	17.2	15.4	16.5	15.8	13.8		21	18.5	16.8	18.2
Hf	6.2	13.4	4.7	9.5	6.2		6.5	5	5.1	4.1	6.3		6.4	9	6.3	6	6.3	5	7.6	6.8	4.3		9	6.4	5.7	5.9
Nb	13	4.3	8.5	11.8	9.9		5.6	4.9	6.2	7.6	8		7.5	12.1	8.2	8	8.1	7.1	10.5	8.7	4.5		10.8	8.8	7.2	6.2
Rb	47.2	6.6	93.4	82.4	158.6		77.9	79.4	156.6	144.6	189.4		89.5	131.6	89.9	92.3	93	8.3	75.9	63.5	3.2		92.3	113.7	90.5	115.4
Sn	6	76.4	2	4	3		1	2	2	2	3		2	3	3	3	3	2	3	2	1		3	2	2	2
Sr	203.8	2	872.9	4363.2	140		141.6	73.6	74.5	404.4	455		28.7	46.3	181.9	204.7	204.6	44.1	1381.1	380.3	271.4		1066.6	127.1	277	128.4
Ta	1.5	133.5	1.4	0.9	0.9		0.4	0.5	0.5	0.7	0.7		0.7	1.2	0.9	1.1	1.5	2.2	1.4	1.9	1.5		0.9	0.8	0.8	0.8
Th	21.4	0.8	10.7	12.7	14.7		5.5	7.5	9.4	10	11.6		12.1	17.9	13.8	12.6	13.8	9.2	14.6	11.4	4.7		17.3	12.5	10.9	11.5
U	5.4	9	4.5	4.2	3.8		2.4	2.2	1.7	1.8	2.5		3.6	18.8	3.3	2.9	3	2.8	4.5	3	1.4		4.3	3	2.5	3.3
V	17	3	114	19	91		129	43	103	105	75		83	102	80	75	74	42	22	24	105		65	119	108	130
W	92	34	103	63.9	55.7		45.7	10.7	6.7	5.6	3.4		11.8	36	121.3	68.8	66.5	156.3	55.3	131.5	107.7		9.9	13.3	28.7	24.9
Zr	181	198.7	161.7	381.9	226.4		236	182.2	167.4	150.8	223.2		235.3	331.6	227.3	219.1	238.4	177.8	294.5	253.4	161.7		302.7	229.9	218.2	199
Y	40.6	156.4	27	38.1	65.9		18.7	26.8	16.9	29.3	32.4		15.7	18.8	38.5	32.6	32.7	22.6	26.8	17.3	18.8		38.6	27.7	48.6	12.5
La	21.8	24.1	24.5	34.6	138.8		27.9	30.2	8.9	49	9.6		18.2	20.7	52.1	35.5	32	23.2	32.3	23.3	18.2		52.1	33.8	42.4	19.1
Ce	48.8	21.8	53.3	72.5	243.8		50.3	18.1	27.8	125.8	17.3		43.5	39.6	112.3	78.6	71.5	46.8	65.2	47.4	35.8		97.4	55.7	90.9	38.6
Pr	6.2	42.6	6.48	9.12	39.44		8.4	8.9	2.23	16.59	2.41		4.07	5.21	13.92	9.69	8.6	5.6	7.95	5.49	4.31		13.21	8.96	10.84	3.77
Nd	24.8	5.03	25.4	35.6	146.2		35.7	33.9	9.5	65	9.6		14.8	19.1	56.1	38.3	34.4	21.7	30.5	20.6	17.1		47.2	35.1	44.9	14.1
Sm	6.46	19.9	5.2	7.71	26.48		6.16	6.84	1.84	13.46	2.68		2.55	3.74	11.51	8.63	7.14	4.31	6.51	3.85	3.47		8.27	6.5	8.48	2.2
Eu	0.39	4	1.16	1.72	4.87		1.5	1.13	0.53	2.58	0.73		0.46	0.73	2	1.55	1.42	0.81	1.36	0.7	0.89		1.53	1.59	1.57	0.57
Gd	6.76	0.54	4.62	7.13	19.47		4.99	5.7	2.33	9.61	3.84		2.47	3.27	9.96	7.22	6.85	3.98	5.87	3.49	3.53		7.09	5.82	7.62	2.1
Tb	1.25	3.95	0.75	1.17	2.88		0.7	0.92	0.41	1.33	0.73		0.4	0.56	1.45	1.05	0.99	0.65	0.88	0.51	0.59		1.15	0.85	1.08	0.32
Dy	8.17	0.68	4.49	7.24	15.06		3.68	5.3	2.56	6.55	5.06		2.61	3.49	7.51	5.99	5.72	3.97	4.88	2.99	3.63		6.78	5.12	6.45	2.13
Ho	1.74	4.03	0.94	1.44	2.8		0.75	1.06	0.64	1.18	1.21		0.56	0.78	1.47	1.14	1.21	0.82	0.93	0.63	0.73		1.37	1.06	1.45	0.45
Er	5.3	0.87	2.84	4.41	6.87		1.96	3.34	2.15	3.07	3.86		1.73	2.55	4.2	3.46	3.36	2.5	2.85	1.79	2.31		4.16	2.98	4.39	1.44
Tm	0.78	2.55	0.4	0.64	0.93		0.3	0.49	0.33	0.42	0.57		0.26	0.4	0.54	0.47	0.47	0.37	0.41	0.29	0.34		0.56	0.45	0.68	0.21
Yb	5.09	0.34	2.57	4.51	5.56		2.09	3.48	2.37	2.87	4		1.83	2.73	3.7	2.87	3.06	2.33	2.75	2.06	2.27		3.59	2.76	4.44	1.47
Lu	0.78	2.36	0.38	0.67	0.77		0.32	0.57	0.41	0.43	0.62		0.3	0.47	0.54	0.44	0.46	0.37	0.41	0.34	0.35		0.56	0.44	0.73	0.23
TOT/C	0.03	0.35	0.11	0.09	0.09		0.02	0.03	0.02	0.12	0.09		0.11	0.21	0.08	0.06	0.07	0.06	0.1	0.11	0.12		0.09	0.11	1.17	0.05
TOT/S	<0.02	0.04	0.04	0.07	<0.02		<0.02	<0.02	<0.02	<0.02	<0.02		<0.02	<0.02	<0.02	0.08	0.11	<0.02	<0.02	<0.02	<0.02		<0.02	<0.02	<0.02	<0.02
Mo	0.2	<0.02	0.2	0.3	<0.1		<0.1	<0.1	<0.1	<0.1	<0.1		0.1	1.2	0.9	0.8	1	0.1	0.2	0.2	0.3		1	1.6	1.1	<0.1
Cu	4	0.5	15.3	3.8	8.2		15.9	12.3	29.9	22.4	14.5		18.2	8.2	29.8	15.3	19.4	4.9	4.9	3	21.6		17.7	16.4	14.4	33.6
Pb	25.3	6.4	13.9	21.2	35.8		9	7.3	7.4	11.3	14.9		14	111.2	15.5	18.4	17.7	19.7	23.2	19	9.2		13.4	14.3	15.7	16
Zn	76	12.9	86	76	44		25	48	64	53	85		60	59	58	98	93	49	40	64	69		68	55	72	70
Ni	2	41	9.4	0.8	3		4	23.2	8.2	9.4	9.4		13.9	8	6.5	9.4	10.5	3	2.1	2.8	14.5		6.7	8.5	12.3	15.9
As	1.6	2.7	2.9	3.3	3.5		<0.5	0.8	1.1	<0.5	<0.5		2.1	1.8	8.9	10	14.7	5.5	5.6	1.7	8.9		6	8.1	11.3	5.2
Cd	0.1	1.5	0.8	<0.1	<0.1		<0.1	<0.1	<0.1	<0.1	<0.1		<0.1	<0.1	0.2	0.6	0.3	<0.1	<0.1	<0.1	<0.1		<0.1	<0.1	<0.1	<0.1
Sb	<0.1	<0.1	0.1	<0.1	0.1		<0.1	<0.1	<0.1	<0.1	<0.1		<0.1	0.7	0.3	0.2	0.3	0.2	0.2	<0.1	0.2		<0.1	0.1	0.2	0.1
Bi	0.5	0.1	0.3	0.4	0.5		0.2	0.3	0.2	0.4	0.4		0.3	0.6	0.6	0.7	0.8	0.3	0.4	0.3	<0.1		0.4	0.5	0.4	0.5
Ag	<0.1	0.2	0.1	<0.1	<0.1		<0.1	<0.1	<0.1	<0.1	<0.1		<0.1	0.3	<0.1	<0.1	0.1	<0.1	<0.1	<0.1	<0.1		<0.1	<0.1	<0.1	<0.1
Au	0.6	<0.1	1.5	<0.5	0.7		1	<0.5	0.9	<0.5	<0.5		2	<0.5	1.7	<0.5	<0.5	0.6	4.5	<0.5	1		1.4	<0.5	0.9	<0.5
Hg	<0.01	<0.5	0.01	0.01	0.05		<0.01	0.05	0.02	0.01	0.02		0.01	0.04	0.02	0.01	0.03	0.64	1.05	0.15	1.54		0.02	0.05	0.02	0.07
Tl	<0.1	<0.01	<0.1	<0.1	<0.1		<0.1	<0.1	<0.1	0.2	0.2		<0.1	0.1	<0.1	<0.1	0.1	<0.1	0.1	<0.1	<0.1		0.2	0.2	<0.1	0.1
Se	<0.5	<0.1	<0.5	<0.5	<0.5		<0.5	<0.5	<0.5	<0.5	<0.5		<0.5	<0.5	<0.5	<0.5	<0.5	<0.5	<0.5	<0.5	<0.5		<0.5	<0.5	0.6	<0.5
		<0.5
Eu/Eu*	0.180449		0.723628	0.70931	0.655793		0.827238	0.553341	0.782652	0.69361	0.695776		0.560427	0.638253	0.57114	0.600396	0.620832	0.597977	0.672681	0.583895	0.777531		0.610936	0.790422	0.597178	0.810837
CIW	69.9061	0.41538	73.1127	76.3292	84.7538		82.2386	89.9832	90.4494	86.5428	91.2519		97.8286	93.3197	74.6723	73.1503	73.281	66.4931	79.2126	74.416	66.2302		88.823	87.2266	60.6446	82.1497
CIA	64.8237	72.738	65.6148	67.3603	67.2407		73.2941	80.3197	73.8532	70.0547	73.1855		87.5066	76.0556	64.2886	62.88	63.0159	65.1638	71.1457	65.0778	65.7087		81.0237	75.2896	54.8201	71.0668
ICV	0.83949	62.4683	0.914427	0.832223	0.660837		0.556711	0.53296	0.77764	0.75797	0.740496		0.459508	0.601169	0.788088	0.875954	0.898615	0.760444	0.653413	0.825859	0.908328		0.629687	0.670085	1.22507	0.921145
LaCN	70.3226	0.819512	79.0323	111.613	447.742		90	97.4194	28.7097	158.065	30.9677		58.7097	66.7742	168.065	114.516	103.226	74.8387	104.194	75.1613	58.7097		168.065	109.032	136.774	61.6129
YbCN	24.3541	70.3226	12.2967	21.5789	26.6029		10	16.6507	11.3397	13.7321	19.1388		8.75598	13.0622	17.7033	13.7321	14.6411	11.1483	13.1579	9.85646	10.8612		17.177	13.2057	21.244	7.03349
LaCN/YbCN	2.88751	20.5128	6.42714	5.17231	16.8306		9	5.85076	2.53178	11.5106	1.61806		6.70509	5.11202	9.49337	8.33933	7.05039	6.713	7.91871	7.62559	5.40543		9.78426	8.25643	6.43824	8.75993
